# Supplementary material
Source: PubMed Central journal article supplement (PMC263755)

**A**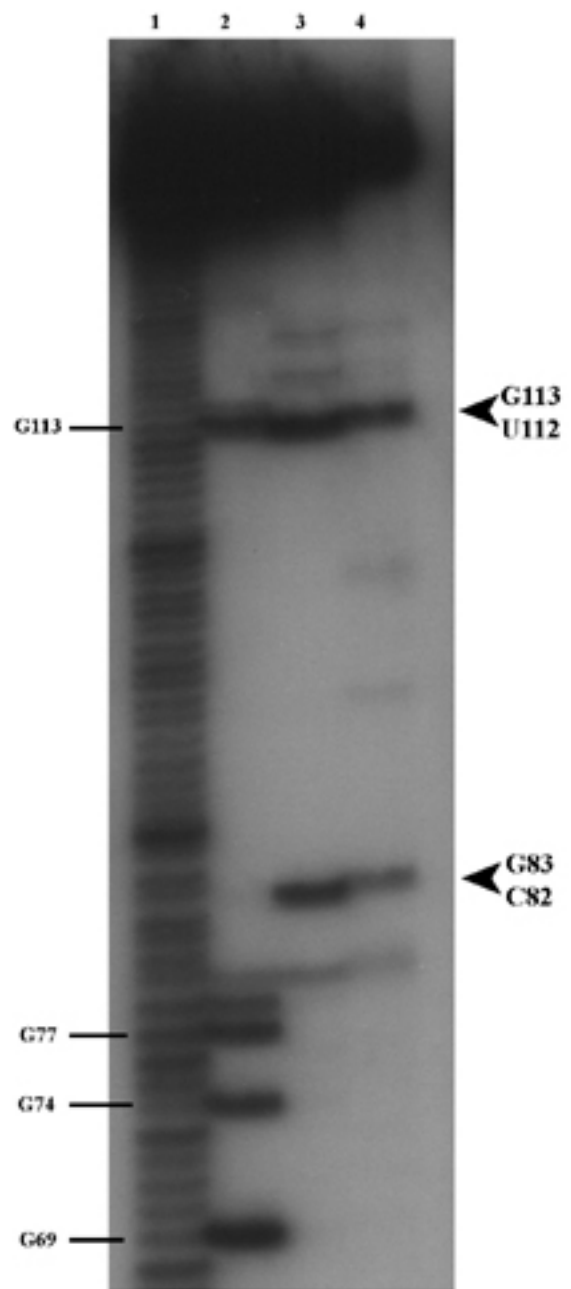**B**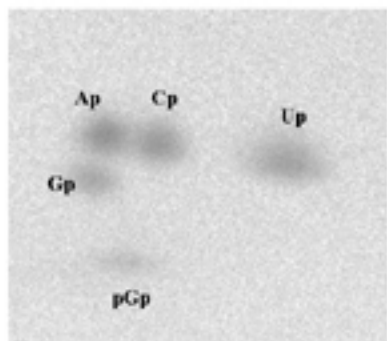**C**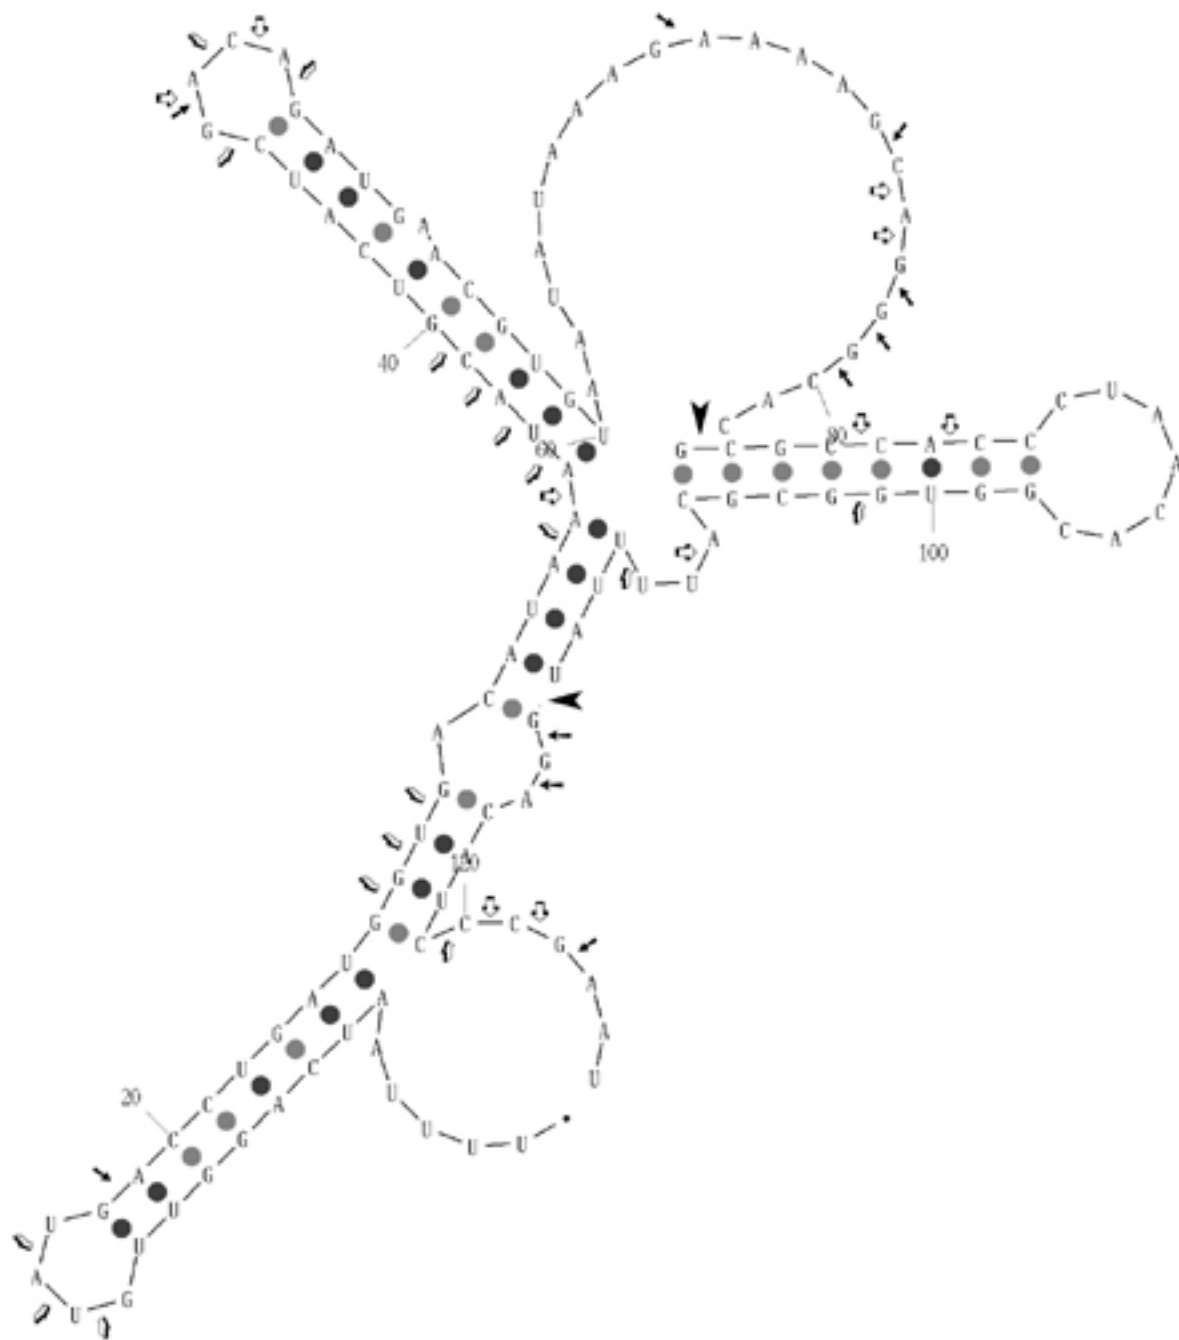

Supplement: pnas_100_23_13213__2.pdf [file pnas_100_23_13213__2.pdf]

**A**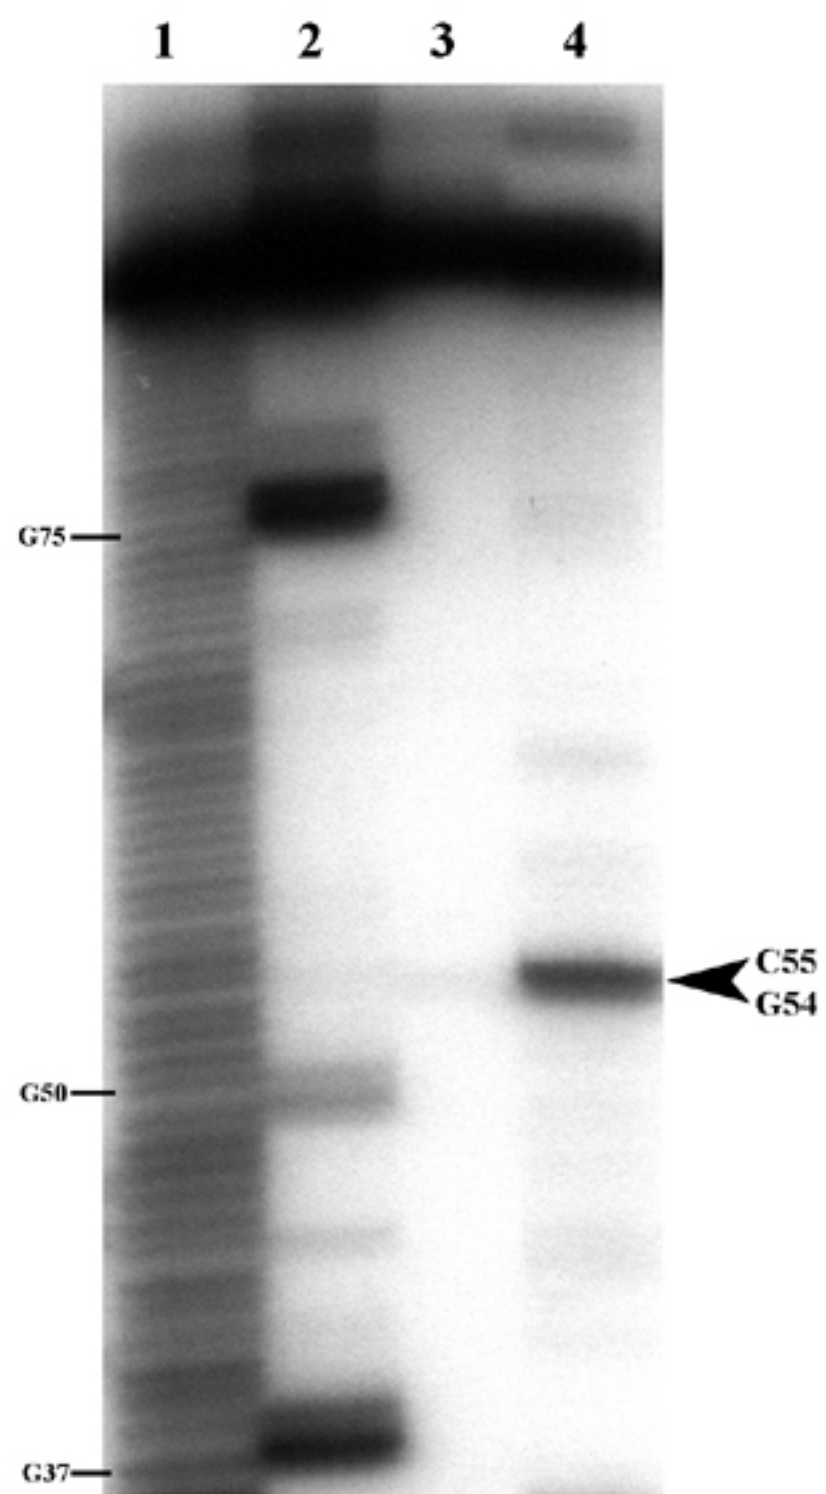**B**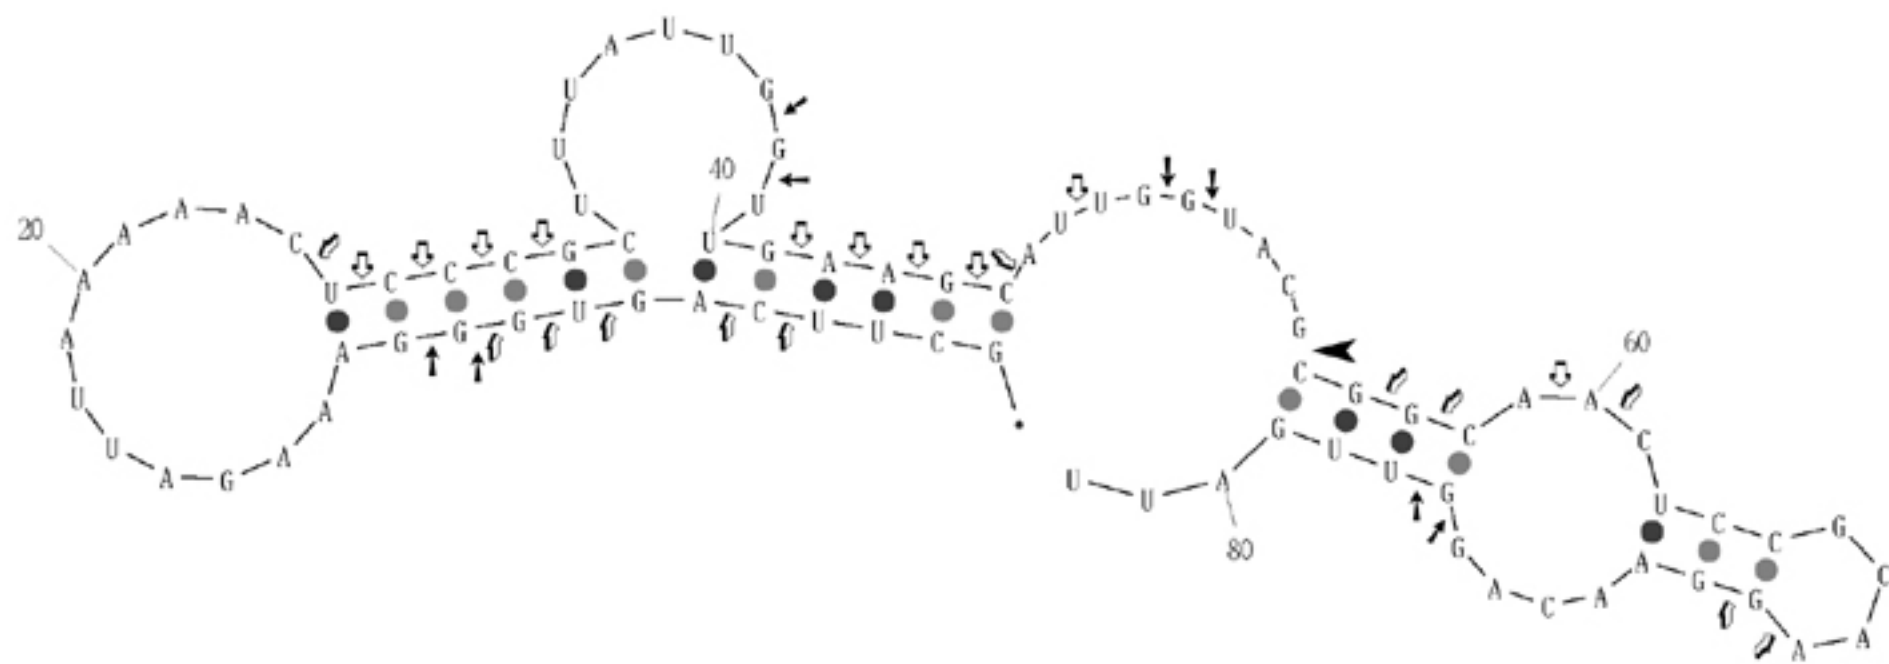

Supplement: pnas_100_23_13213__6.pdf [file pnas_100_23_13213__6.pdf]
